# Supplementary material for: Spatiotemporal Patterns of the Omicron Wave of COVID-19 in the United States
Source: MDPI journal article supplement (doi:10.3390/tropicalmed8070349), 2023-06-30
Supplement: s1 [file s1]

## Supplementary Materials

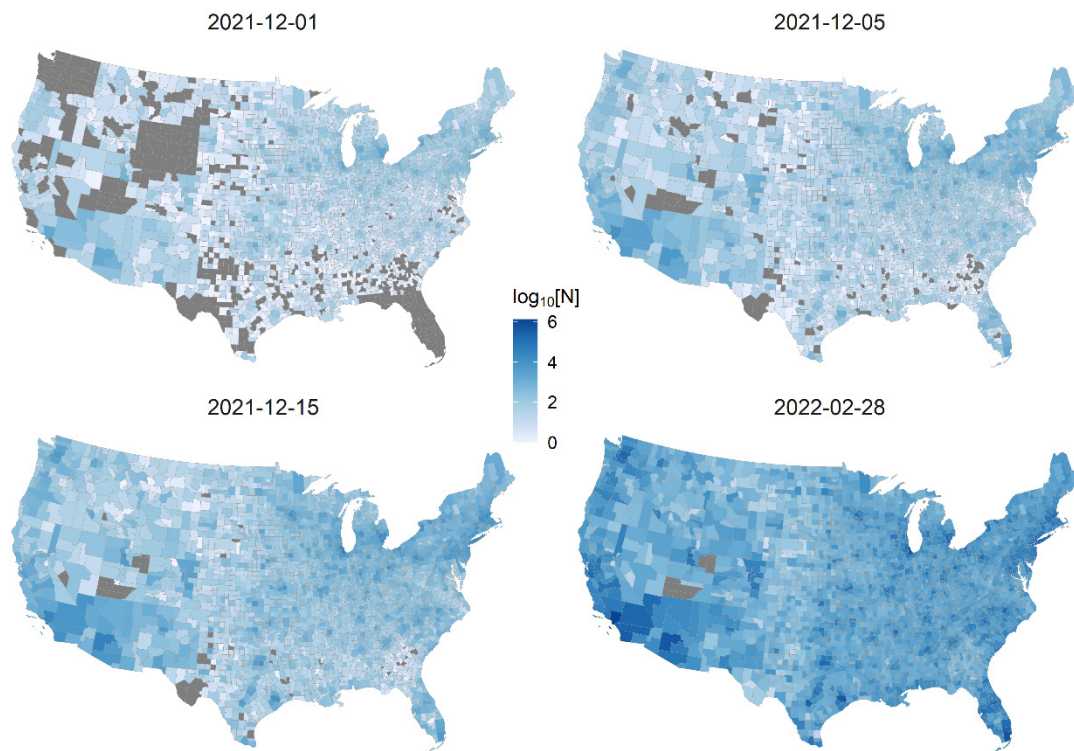

**Figure S1. Spatial distributions of the COVID-19 cases during the Omicron wave across the continental United States.** The Omicron cases is defined as the accumulative COVID-19 cases from November 30, 2021 to a following date. (a) 1 December 2021; (b) 5 December 2021; (c) 15 December 2021; (d) 28 February 2022.

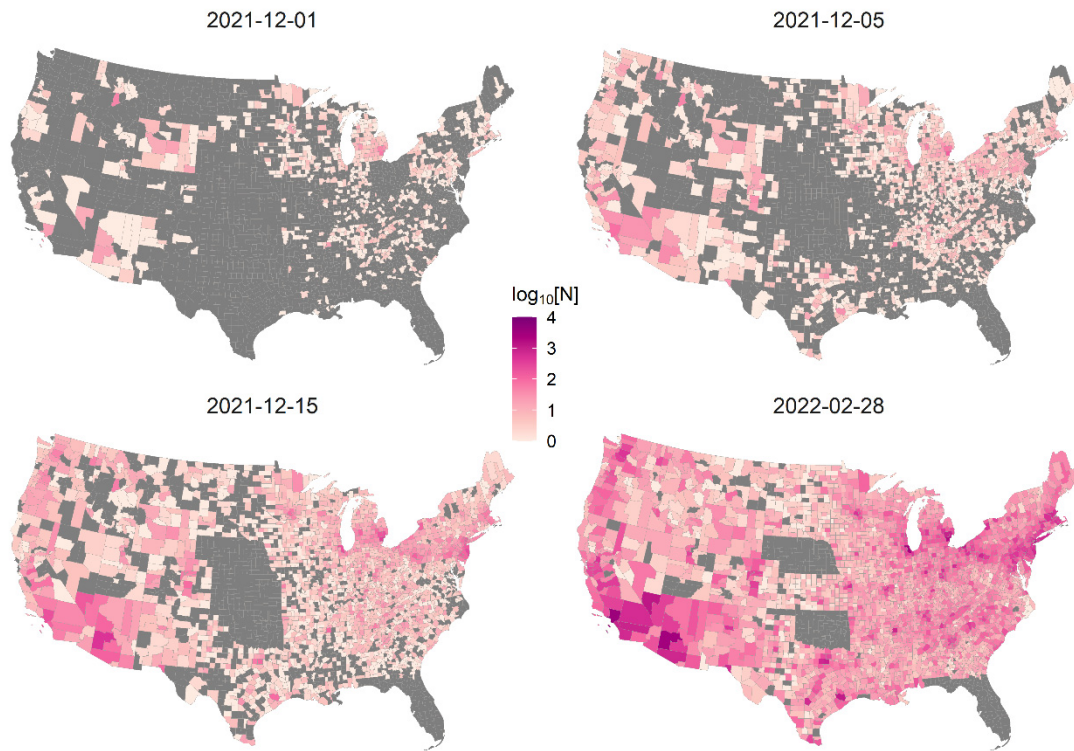

**Figure S2. Spatial distributions of the COVID-19 deaths during the Omicron wave across the continental United States.** The Omicron deaths is defined as the accumulative COVID-19 deaths from November 30, 2021 to a following date. (a) 1 December 2021; (b) 5 December 2021; (c) 15 December 2021; (d) 28 February 2022.

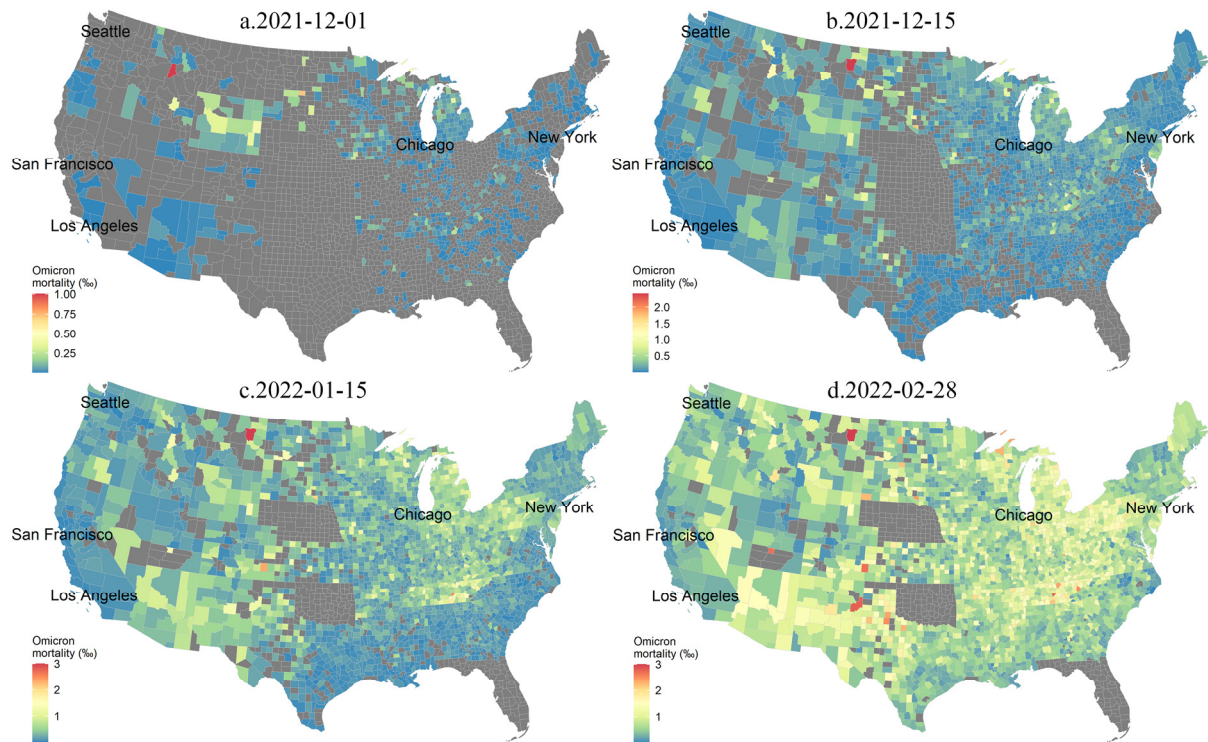

**Figure S3. Spatial distributions of the COVID-19 mortality during the Omicron wave across the continental United States.** The Omicron mortality is defined as the accumulative COVID-19 deaths to the population from November 30, 2021 to a following date. (a) 1 December 2021; (b) 15 December 2021; (c) 15 January 2022; (d) 28 February 2022.

**Table S1.** Spatiotemporal cluster information of newly added COVID-19 deaths in the US at different phases.

| Cluster | Duration(days)                       | Number<br>of<br>counties | p      | Observed | Expected | RR    | Number of<br>counties<br>with RR > 1 |
|---------|--------------------------------------|--------------------------|--------|----------|----------|-------|--------------------------------------|
| 1       | 1 December 2021–2<br>December 2021   | 321                      | <0.001 | 300      | 81       | 3.7   | 220                                  |
| 2       | 15 December 2021–16<br>December 2021 | 44                       | <0.001 | 2057     | 179      | 11.61 | 39                                   |
| 3       | 22 December 2021–23<br>December 2021 | 234                      | <0.001 | 1885     | 132      | 14.45 | 204                                  |
| 4       | 29 December 2021–11<br>February 2022 | 286                      | <0.001 | 15659    | 7565     | 2.19  | 270                                  |
| 5       | 16 January 2022–25<br>February 2022  | 202                      | <0.001 | 5334     | 2825     | 1.92  | 155                                  |
| 6       | 24 January 2022–25<br>February 2022  | 222                      | <0.001 | 3345     | 1766     | 1.91  | 146                                  |
| 7       | 31 January 2022–25<br>February 2022  | 362                      | <0.001 | 6595     | 3598     | 1.87  | 221                                  |
| 8       | 7 February 2022–9<br>February 2022   | 94                       | <0.001 | 391      | 208      | 1.88  | 35                                   |
| 9       | 10 February 2022–11<br>February 2022 | 26                       | <0.001 | 788      | 264      | 3     | 7                                    |
| 10      | 23 February 2022–24<br>February 2022 | 297                      | <0.001 | 716      | 148      | 4.87  | 191                                  |
